# Supplementary material
Source: JCI journal article supplement (doi:10.1172/jci138636)
Supplement: sd2 [file 2]

Non-clinical trial human subjects research. Primary outcome (change in bone marrow adipose tissue) is not a clinically relevant outcome at the present time.
